# Supplementary material for: Diurnal modulation of subthalamic beta oscillatory power in Parkinson’s disease patients during deep brain stimulation
Source: bioRxiv or medRxiv preprint supplement (doi:10.1101/2022.02.09.22270606), 2022-02-11

**A****Desired**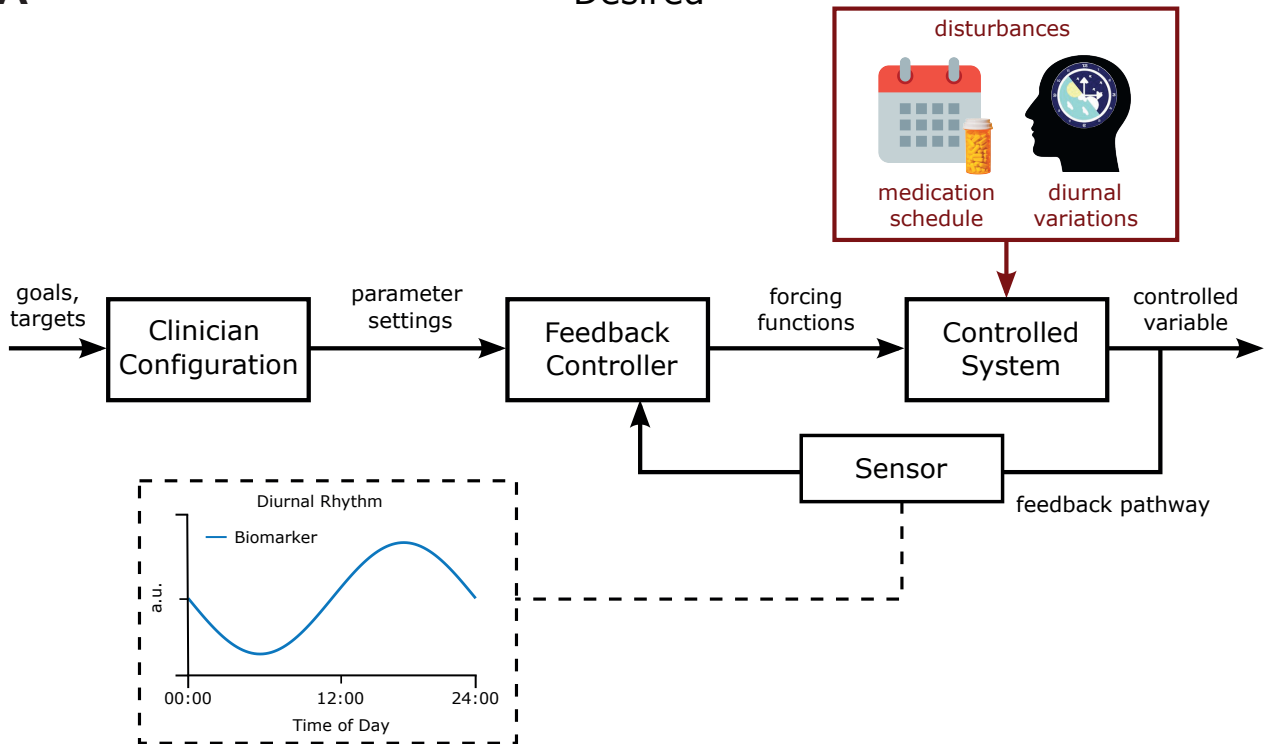**B****Reality**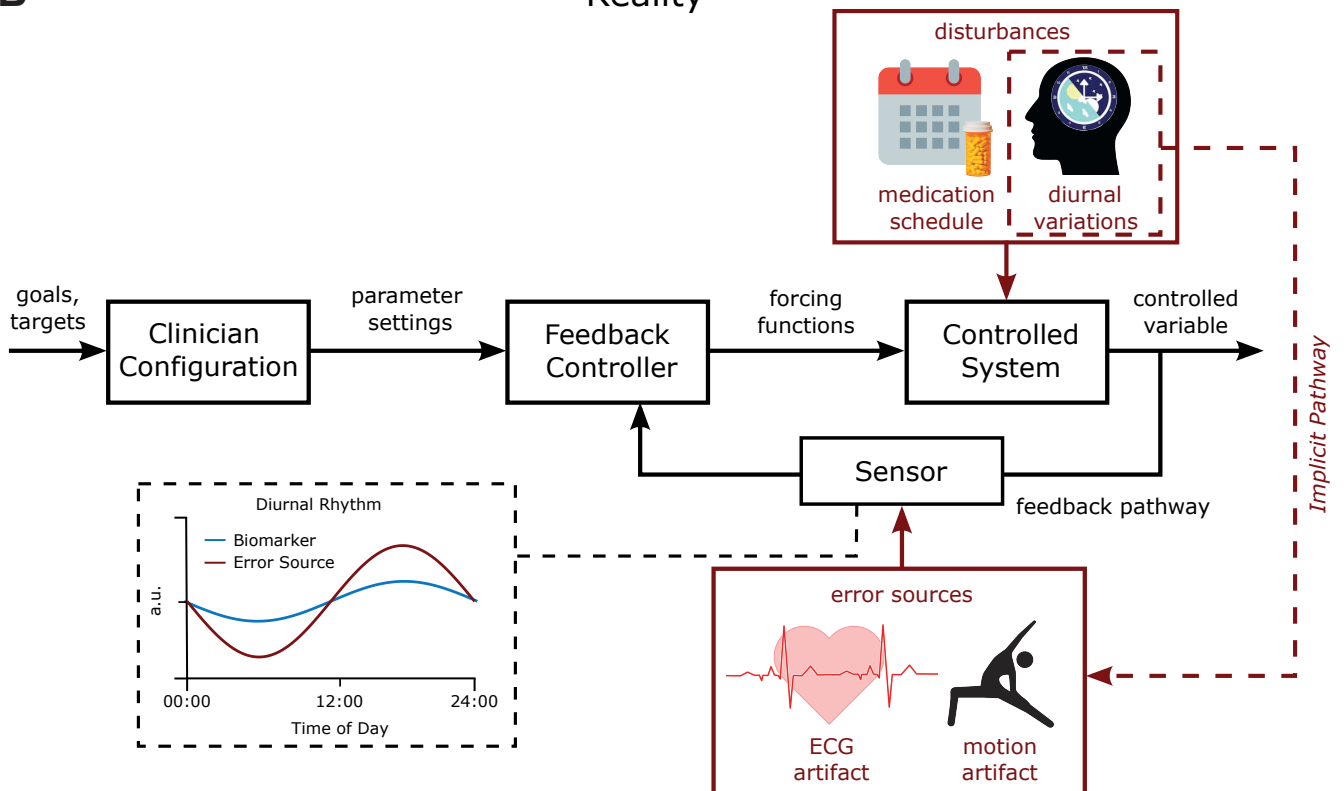

Supplement: Supplementary file [file media-6.pdf]
